# Supplementary material for: Fabrication of hierarchical architectures of Tb-MOF by a “green coordination modulation method” for the sensing of heavy metal ions
Source: Royal Society of Chemistry journal article supplement (doi:10.1039/c3ce40820e), 2013-01-01

# Supporting Information for

## **Fabrication of hierarchical architectures Tb-MOF by “green coordination modulation method” for the sensing of heavy metal ions**

Dani Cai, Hailing Guo\*, Ling Wen, Chenguang Liu\*

State Key Laboratory of Heavy Oil Processing, Key Laboratory of Catalysis, China National Petroleum Corp. (CNPC) China University of Petroleum (East China), Qingdao 266555, P. R. China

\*Corresponding author. Tel: +86 532 86981716; Fax: +86 532 86981787; E-mail: guohl@upc.edu.cn

Table S1. pH values of the reaction solution

| Reaction solution | Absence of<br>sodium acetate | 0.4mmol sodium<br>acetate | 0.5mmol sodium<br>acetate | 0.6mmol sodium<br>acetate |
|-------------------|------------------------------|---------------------------|---------------------------|---------------------------|
| pH value          | 2.46                         | 5.44                      | 5.93                      | 6.33                      |

Figure S1. TGA of rod-like crystals (black line), dual-core shelled peanut-like crystals (red line) and double-head dandelion-like crystals (blue line).

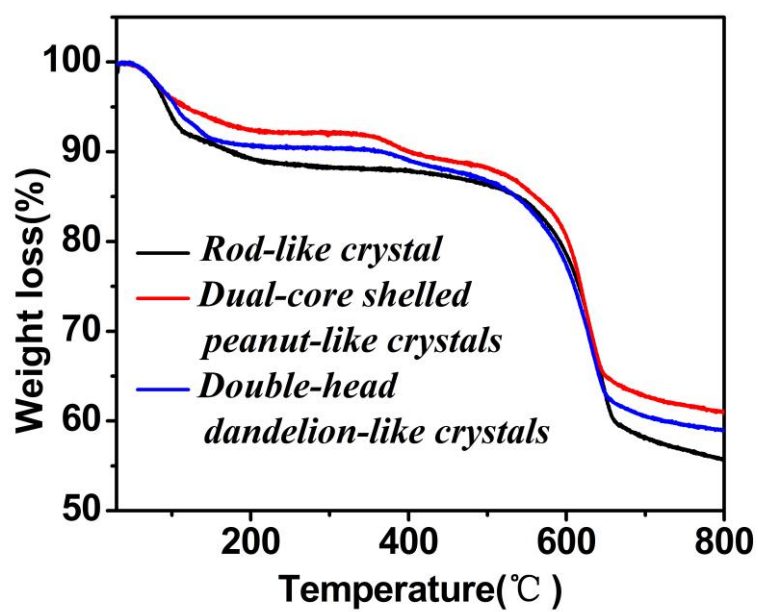

Figure S2. XRD pattern of dual-core shelled peanut-like crystals collected from different stirring reaction and crystallization reaction time.

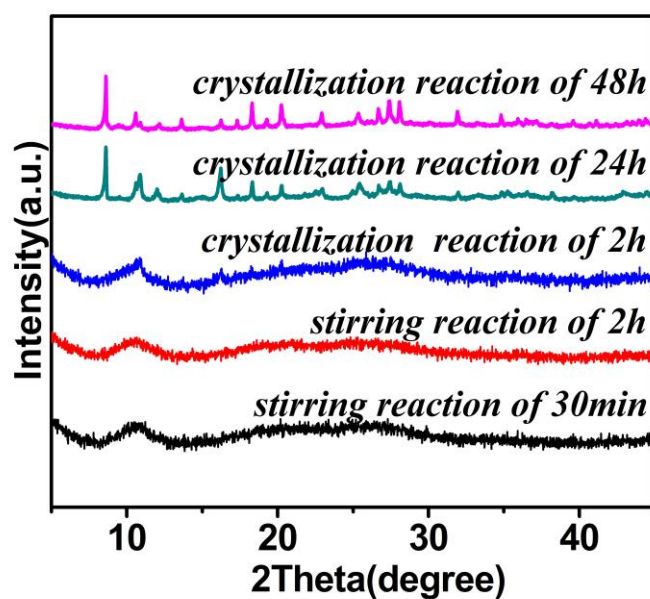

Figure S3. XRD pattern of double-head dandelion-like crystals collected from different stirring reaction and crystallization reaction time.

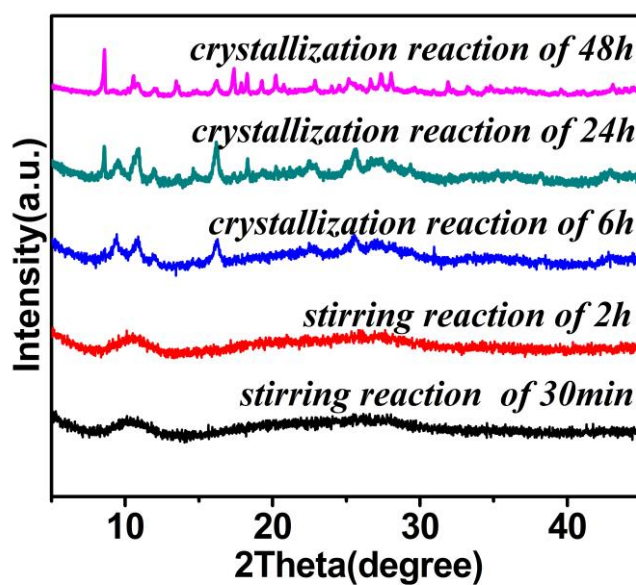

Figure S4. Excitation and emission spectra of rod-like crystals.

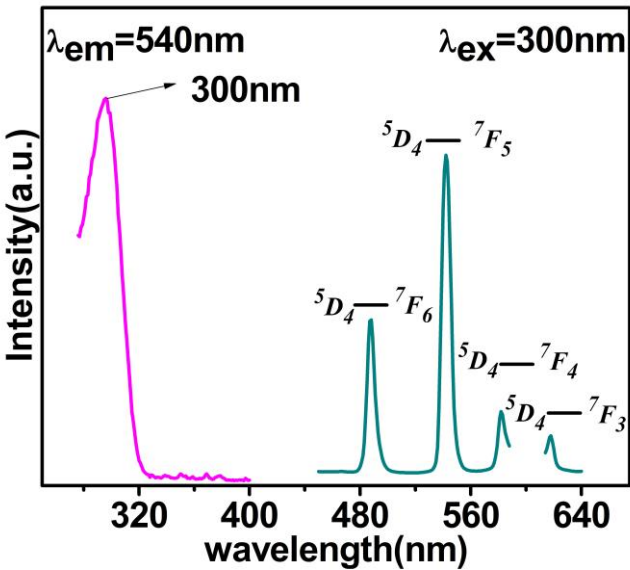

Figure S5. XRD pattern of samples synthesized with soluble salt (NaCl, KCl and  $\text{CaCl}_2$ ).

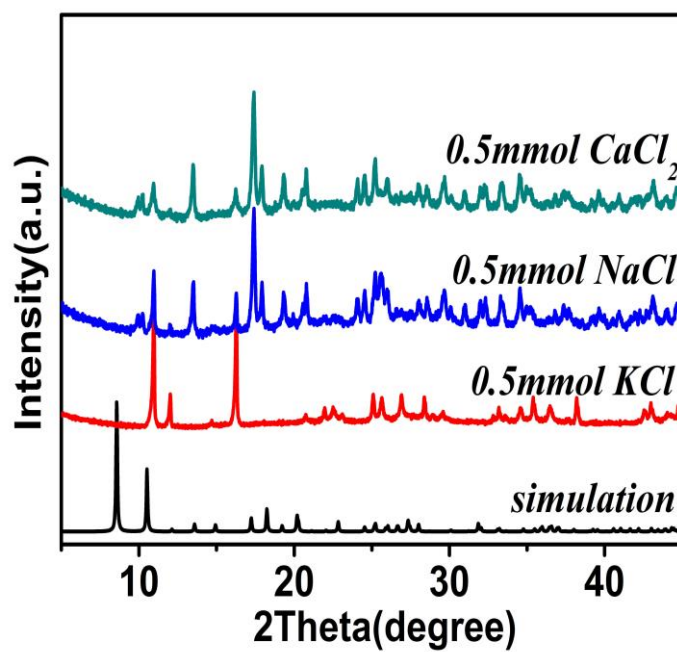

Supplement: c3ce40820e.pdf [file c3ce40820e.pdf]
